# Supplementary material for: Two chemically robust Cd(ii)-frameworks for efficient sensing of levofloxacin, benzaldehyde, and Fe3+ions
Source: Royal Society of Chemistry journal article supplement (doi:10.1039/d1dt03205d), 2021-01-01
Supplement: d1dt03205d1.pdf [file d1dt03205d1.pdf]

Supporting Information for Dalton Trans 2021

Two chemically robust Cd(II)-frameworks for efficient sensing of  
levofloxacin, benzaldehyde, and Fe<sup>3+</sup> ions

Yu-Qiao Su<sup>a</sup>, Lianshe Fu<sup>b</sup>, Guang-Hua Cui<sup>a\*</sup>

*<sup>a</sup>College of Chemical Engineering, Hebei Key Laboratory for Environment Photocatalytic and*

*Electrocatalytic Materials, North China University of Science and Technology, No. 21 Bohai*

*Road, Caofeidian new-city, Tangshan, Hebei, 063210, P. R. China*

*<sup>b</sup>Department of Physics and CICECO-Aveiro Institute of Materials, University of Aveiro, 3810-*

*193 Aveiro, Portugal*

Corresponding author: Guang-Hua Cui

Fax: +86-315-8805462. Tel: +86-315-8805460.

E-mail: tscghua@126.com

## **CONTENTS**

**Section 1. Experimental Section**

**Section 2. Supplementary Scheme, Tables and Figures**

**Section 3. Supplementary Characterizations**

## **Section 1. Experimental Section**

1. Materials and physical measurements
2. Single crystal X-ray diffraction determination
3. Anti-interference experiments
4. Computational Details
5. Mott-Schottky curves measurements
6. Formulas

## 1. Materials and physical measurements

All chemicals and reagents were obtained from a commercial approach and used without further purification. Elemental analyses (C, H, and N) were carried out by a Perkin-Elmer 240C analyzer. FTIR spectra in the region of 4000–400  $\text{cm}^{-1}$  were collected on the Bruker VERTEX 80V FTIR spectrophotometer. The morphologies of **1** and **2** were analyzed using a JEOL JSM-IT100 scanning electron microscope (SEM; JEOL Instruments, Tokyo, Japan) with a gold coating. Powder X-ray diffraction (PXRD) patterns were obtained on a Rigaku D/Max-2500PC diffractometer under the conditions of the X-ray tube of 40 kV and 40 mA with Cu target tube ( $\lambda = 1.5418 \text{ \AA}$ ). Thermogravimetric analyses (TGA) of MOFs were investigated with a Netzsch STA449 F1 thermal analyzer in the air atmosphere with a heating rate of 10  $^{\circ}\text{C}/\text{min}$  in the range of 25–800  $^{\circ}\text{C}$ . Inductively coupled plasma mass spectrometry was conducted on a Varian model ICP spectrometer. The luminescence spectra were recorded on Edinburgh instruments FS5 spectrophotometer.

## 2. Single crystal X-ray diffraction determination

Crystallographic data for single crystals of **1** and **2** were collected on a Rigaku XtaLabMini diffractometer with Mo-K $\alpha$  radiation ( $\lambda=0.71073 \text{ \AA}$ ). The reflection data were processed by the CrysAlisPro program. [1] Structural analysis and data refinement were performed through the SHELXT-2015 and SHELXL-2018 programs. [2] The atomic coordinates and anisotropic parameters of the compound were refined by the full matrix least-squares method. Non-hydrogen atoms were treated anisotropically. The H atoms in water molecules were added by difference Fourier maps and with fixed displacement parameters. The other H atoms were geometrically

generated adopting a riding model and isotropically refined. Their primary crystallographic data are summarized in Table S1. The selected bonds distances and angles are listed in Table S2.

### 3. Anti-interference experiments

The anti-interference experiments were performed in the presence of the same concentration of levofloxacin (LEV) and other ions antibiotics (0.1 mM, amoxicillin (AMX), chlortetracycline (CTC), ciprofloxacin (CIP), doxycycline hyclate (DH), metronidazole (MDZ), nitrofurantoin (NFT), norfloxacin (NOR), oxytetracycline (OTC), ronidazole (RNZ), sulfadiazine (SDZ), sulfamethazine (SMZ), sulfamethoxazole (SMX), tetracycline (TC)). Anti-interference experiments for benzaldehyde recorded luminescence intensities of **1** and **2** (4 mg) in the presence of the analyte (2 ml) and other organics (2 ml) (acetonitrile (MeCN), cyclohexane (CY), dichloromethane (DCM), ethanol (EtOH), ethylene glycol (EG), glycol (GL), methanol (MeOH), n-butanol (NB), n-methyl pyrrolidone (NMP)). As for iron ions, Anti-interference sensing experiments were further implemented in EtOH/H<sub>2</sub>O (1:1, v/v). The **1** or **2** powder was added to a mixed solution containing the Fe<sup>3+</sup> ions and other metal ions (Na<sup>+</sup>, K<sup>+</sup>, Mg<sup>2+</sup>, Ca<sup>2+</sup>, Sr<sup>2+</sup>, La<sup>3+</sup>, Sm<sup>3+</sup>, Gd<sup>3+</sup>, Tb<sup>3+</sup>, Er<sup>3+</sup>, Pb<sup>2+</sup>) at a concentration of 0.5 mM.

### 4. Computational Details

All calculations on electronic structures were carried out *via* ORCA 2.8 program [3]. Geometry optimizations was calculated through density functional theory (DFT). The frontier orbital energy of Cd(II) ions, free L1, L2, H<sub>2</sub>tdc, and BZH were calculated by B3LYP/TZVP.[4–6] Molecular orbital visualization was analyzed by VMD 1.9.3 program. [7] The structural properties of the two Cd(II)-MOFs were calculated by Poreblazer v4.0 program (Table S3). [8]

### 5. Mott-Schottky curves measurements

Electrochemical measurements of the crystal materials were carried out at room temperature in a three-electrode cell. A CHI600A potentiostat connected to an analyzer was employed in the electrochemical measurements. Glassy carbon electrodes (GCE,  $\varnothing = 3$  mm) were coated with the Cd(II)-MOFs as follows: 24 mg powders of the as-synthesized **1–2** were ultrasonicated in 4 mL ethanol for 2 h. Then, 30  $\mu$ L of the suspensions were evenly spread on the surfaces of the GCE and dried in air for 30 min at room temperature. Next, 10  $\mu$ L of 0.2% Nafion solution was quantitatively put onto the surfaces of the modified GCE. Finally, the Cd(II) complexes/GCE were obtained after drying air for about 1 h. Three electrode systems include Cd-MOFs **1–2** as the working electrode, respectively, a Pt-wire counter electrode and an Ag/AgCl reference electrode. The Mott-Schottky curves were measured in 0.1 M Na<sub>2</sub>SO<sub>4</sub> aqueous solution. The AC amplitude was set as 10 mV, and the frequency was 1000, 1500, 2000 Hz.

## 6. Formulas

The Stern-Volmer (SV) plot

$$(I_0/I) = 1 + K_{sv} [M]$$

where  $I_0$  and  $I$  are the maximum luminescent intensities before and after the addition of the targeted species,  $K_{sv}$  represents the quenching constant and  $[M]$  is the analyte concentration.

The low limit of detection (LOD)

$$\text{LOD} = 3\sigma/k$$

where  $\sigma$  stands for standard deviation, and  $k$  is the slope of the quenching curve.

The fluorescence lifetime

$$y(t) = B_1 e^{-t/\tau_1} + B_2 e^{-t/\tau_2}$$

which is obtained by a bi-exponential fit of the fluorescence decay data and where  $\tau_1$  and  $\tau_2$

represent the components of fluorescence lifetime,  $B_1$  and  $B_2$  are the corresponding amplitudes, and  $t$  is the instantaneous time.

The average fluorescence lifetime

$$\tau_{avg} = (B_1\tau_1^2 + B_2\tau_2^2)/(B_1\tau_1 + B_2\tau_2)$$

The conduction band (CB) and valence band (VB) positions

$$E_{VB} = E_{CB} - E_g$$

where  $E_{VB}$  is the VB potential,  $E_{CB}$  is the CB potential, and  $E_g$  is the bandgap energy of the crystal materials.

## References

- [1] CrysAlisPro, Oxford Diffraction/Agilent Technologies UK Ltd., Yarnton, UK.
- [2] H. Erer, O. Z. Yesilel, and M. Arıcı, Cryst. Growth Des., 2015, 15, 3201–3211.
- [3] F. Neese, Wiley Interdiscip. Rev. Sci., 2012, 2, 73–78.
- [4] A. D. Becke, J. Chem. Phys., 1993, 5648.
- [5] A. D. Becke, Phys. Rev., 1988, 38, 3098.
- [6] O. Treutler, Re. Ahlrichs, J. Chem. Phys., 1995, 102, 346–354.
- [7] W. Humphrey, A. Dalke, K. Schulten, J. Mol. Graphics, 1996, 14, 33–38.
- [8] L. Sarkisov, R. B. Perez, M. Sutharson, D. F. Jimenez, Chem. Mater, 2020, 32, 9849–9867.

## Section 2. Supplementary Tables and Figures

Scheme Titles:

**Scheme S1** The chemical structures of different types of antibiotics.

Table Titles:

**Table S1** Crystallographic data and refinement parameter for **1** and **2**.

**Table S2** The selected bond lengths (Å) and angles (°) for **1** and **2**.

**Table S3** The structural properties for **1** and **2**.

Figure Titles:

**Fig. S1** One 1D double straight-line of metal Cd(II) growth by tdc<sup>2-</sup> ligands.

**Fig. S2** 1D chain of metal Cd(II) growth by tdc<sup>2-</sup> or L2 ligands.

**Fig. S3** The infrared spectra of **1** and **2**.

**Fig. S4.** SEM images of the powdered **1** and **2**.

**Fig. S5.** The PXRD patterns for the simulated, synthesized samples, and removal of water molecules samples at 153°C for **1/2**.

**Fig. S6.** TGA plots of complexes **1–2**

**Fig. S7.** Time-dependent luminescence emission spectra of **1** and **2** from 0 to 150 min by 15 min step (a) in water; (b) in EtOH.

**Fig. S8.** The change of the fluorescence emission intensities of **1** and **2** in different pH solutions.

**Fig. S9** Plots for the selective detection of LEV over other antibiotics mentioned.

**Fig. S10** Relative intensities for **1** and **2** immersed in the individual solvents and mixtures of competing solvents including BZH.



**Fig. S11.** Comparison of the fluorescence emission intensities of **1/2** for sensing Fe<sup>3+</sup> ions ( $5 \times 10^{-4}$  M) in the presence of other ions ( $5 \times 10^{-4}$  M).

**Fig. S12.** The luminescence intensities of **1/2** for sensing LEV (a), BZH (b), and Fe<sup>3+</sup> ions (c) over three cycles; (d) PXRD patterns of the simulated of **1/2** after sensing for three cycles.

**Fig. S13.** Mott–Schottky plots for the two as-prepared materials in 0.1 M Na<sub>2</sub>SO<sub>4</sub> aqueous solution. AC amplitude is 10 mV, and the frequency is 1000, 1500, and 2000 Hz, respectively

**Fig. S14.** Diffuse reflectance spectra of Kubelka–Munk function vs. energy of **1–2**.

**Fig. S15.** Schematic band structures of **1**, **2**, LEV, BZH, and Fe<sup>3+</sup> ions.

**Fig. S16.** Fluorescence excitation/emission spectra of **1/2** and UV–Vis absorption spectra of selected analytes.

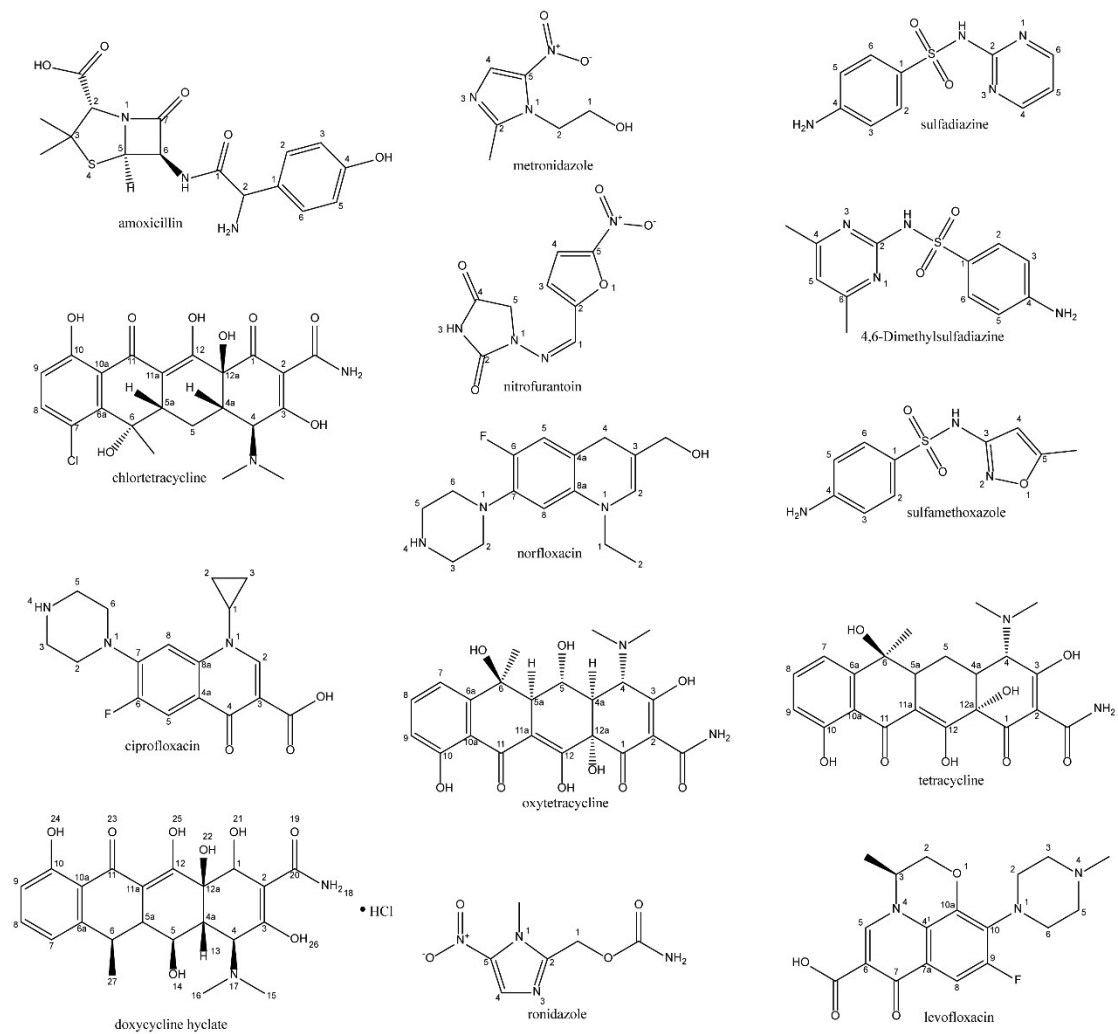

**Scheme S1** The chemical structures of different types of antibiotics.

**Table S1** Crystallographic data and refinement parameter for **1** and **2**.

| MOF                                                                               | <b>1</b>                                                                 | <b>2</b>                                  |
|-----------------------------------------------------------------------------------|--------------------------------------------------------------------------|-------------------------------------------|
| Chemical formula                                                                  | [Cd <sub>2</sub> (L1)(tdc) <sub>2</sub> (H <sub>2</sub> O)] <sub>n</sub> | [Cd(L) <sub>0.5</sub> (tdc)] <sub>n</sub> |
| Formula weight                                                                    | 1085.70                                                                  | 532.85                                    |
| Crystal system                                                                    | monoclinic                                                               | monoclinic                                |
| Space group                                                                       | <i>I</i> <sub>2</sub> / <i>a</i>                                         | <i>P</i> 2 <sub>1</sub> / <i>n</i>        |
| <i>a</i> (Å)                                                                      | 23.9212(9)                                                               | 10.1950(12)                               |
| <i>b</i> (Å)                                                                      | 10.3352(3)                                                               | 21.3148(15)                               |
| <i>c</i> (Å)                                                                      | 34.8506(15)                                                              | 10.7401(9)                                |
| <i>α</i> (°)                                                                      | 90                                                                       | 90                                        |
| <i>β</i> (°)                                                                      | 90.661(4)                                                                | 117.238(13)                               |
| <i>γ</i> (°)                                                                      | 90                                                                       | 90                                        |
| <i>V</i> (Å <sup>3</sup> )                                                        | 8615.6(6)                                                                | 2075.1(4)                                 |
| <i>Z</i>                                                                          | 8                                                                        | 4                                         |
| <i>D</i> <sub>calcd</sub> (g/cm <sup>3</sup> )                                    | 1.674                                                                    | 1.706                                     |
| Absorption coefficient, mm <sup>-1</sup>                                          | 1.150                                                                    | 1.188                                     |
| <i>F</i> (000)                                                                    | 4352                                                                     | 1068                                      |
| Crystal size, mm                                                                  | 0.26×0.25×0.24                                                           | 0.26×0.24×0.22                            |
| <i>θ</i> range, deg                                                               | 4.108–60.96                                                              | 4.674–61.006                              |
| Index range <i>h, k, l</i>                                                        | –33/33, –14/14, –49/49                                                   | –14/14, –29/29, –15/15                    |
| Reflections collected                                                             | 116794                                                                   | 27549                                     |
| Independent reflections ( <i>R</i> <sub>int</sub> )                               | 12823 (0.0633)                                                           | 5984(0.0362)                              |
| Data/restraint/parameters                                                         | 12823/0/570                                                              | 5984/0/280                                |
| Goodness-of-fit on <i>F</i> <sup>2</sup>                                          | 1.159                                                                    | 1.072                                     |
| Final <i>R</i> <sub>1</sub> , <i>wR</i> <sub>2</sub> ( <i>I</i> > 2σ( <i>I</i> )) | 0.0439, 0.0981                                                           | 0.0319, 0.0735                            |
| Largest diff. peak and hole                                                       | 0.95, –1.25                                                              | 0.55, –1.32                               |

**Table S2** The selected bond lengths (Å) and angles (°) for **1** and **2**.

| Parameter  | Value     | Parameter   | Value     |
|------------|-----------|-------------|-----------|
| <b>1</b>   |           |             |           |
| Cd1–O9     | 2.337(3)  | O9–Cd1–O8A  | 86.34(1)  |
| Cd1–O1     | 2.324(3)  | O1–Cd1–O8A  | 88.83(1)  |
| Cd1–O7A    | 2.440(3)  | O7A–Cd1–O8A | 54.94(1)  |
| Cd1–O8A    | 2.317(3)  | O8A–Cd1–N1  | 143.71(1) |
| Cd1–O5     | 2.189(3)  | O5–Cd1–O9   | 85.45(1)  |
| Cd2–N1     | 2.327(3)  | O5–Cd1–O1   | 99.83(1)  |
| Cd2–O4A    | 2.492(3)  | O5–Cd1–O7A  | 167.04(1) |
| Cd2–O10    | 2.304(3)  | O5–Cd1–O8A  | 123.31(1) |
| Cd2–O2     | 2.219(3)  | O5–Cd1–N1   | 92.23(1)  |
| Cd2–O3A    | 2.260(3)  | O9–Cd1–N1   | 89.83(1)  |
| Cd2–N6B    | 2.390(3)  | O7A–Cd1–N1  | 88.80(1)  |
| Cd2–N3B    | 2.334(3)  | O10–Cd2–O4A | 89.96(1)  |
| O9–Cd1–O7A | 81.64(1)  | O10–Cd2–O4A | 89.96(1)  |
| O1–Cd1–O9  | 174.25(1) | O10–Cd2–N6B | 82.41(1)  |
| O1–Cd1–O7A | 93.03(1)  | O10–Cd2–N3B | 161.14(1) |
| O1–Cd1–N1  | 92.23(1)  | O2–Cd2–O4A  | 166.54(1) |
| <b>2</b>   |           |             |           |
| Cd1–O2     | 2.293(2)  | N1–Cd1–N3B  | 92.21(1)  |
| Cd1–O1     | 2.450(2)  | N3B–Cd1–O1  | 123.66(1) |
| Cd1–O4A    | 2.329(2)  | O3A–Cd1–O1  | 142.02(1) |
| Cd1–O3A    | 2.347(2)  | O3A–Cd1–N3B | 88.61(1)  |
| Cd1–N1     | 2.270(2)  | N1–Cd1–O2   | 136.66(1) |
| Cd1–N3B    | 2.370(2)  | N1–Cd1–O1   | 96.17(1)  |
| O2–Cd1–O1  | 55.28(1)  | N1–Cd1–O4A  | 120.97(1) |
| O2–Cd1–O4A | 91.46(1)  | N1–Cd1–O3A  | 102.60(1) |
| O2–Cd1–O3A | 120.01(1) | O4A–Cd1–O3A | 56.20(1)  |
| O2–Cd1–N3B | 81.75(1)  | O4A–Cd1–N3B | 134.35(1) |

Symmetry codes for **1**: A =  $x, y+1, z$ ; B =  $0.5+x, 2-y, z$ ; for **2**: A =  $0.5+x, 0.5-y, z-0.5$ ; B =  $2-x, 1-y, -z$ ; C =  $2-x, 1-y, 1-z$ .

**Table S3** The structural properties for **1** and **2**.

| property                                    | <b>1</b> | <b>2</b> |
|---------------------------------------------|----------|----------|
| accessible surface area, m <sup>2</sup> /g  | 3295.07  | 3550.37  |
| geometric pore volume, cm <sup>3</sup> /g   | 1.21     | 1.23     |
| probe-occupiable volume, cm <sup>3</sup> /g | 1.10     | 1.10     |
| helium pore volume, cm <sup>3</sup> /g      | 0.91     | 0.84     |
| pore limiting diameter, Å                   | 6.97     | 4.62     |
| largest cavity diameter, Å                  | 8.60     | 5.77     |

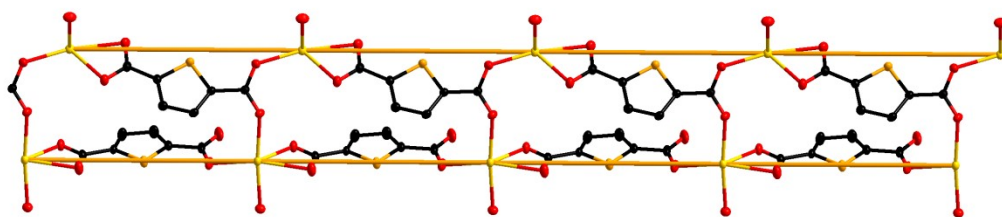

Fig. S1 One 1D double straight-line of metal Cd(II) growth by tdc<sup>2-</sup> ligands.

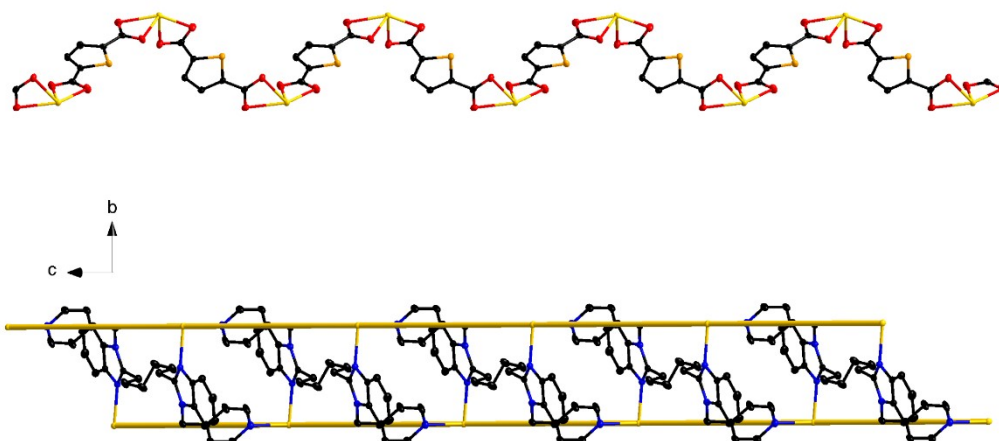

Fig. S2 1D chain of metal Cd(II) growth by  $\text{tdc}^{2-}$  or L2 ligands.

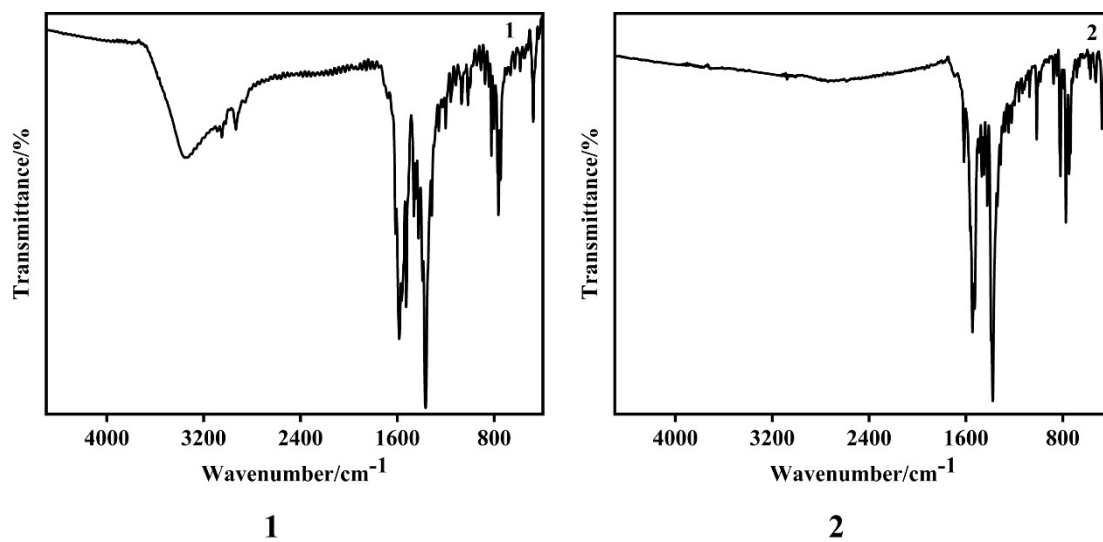

Fig. S3 The infrared spectra of 1 and 2.



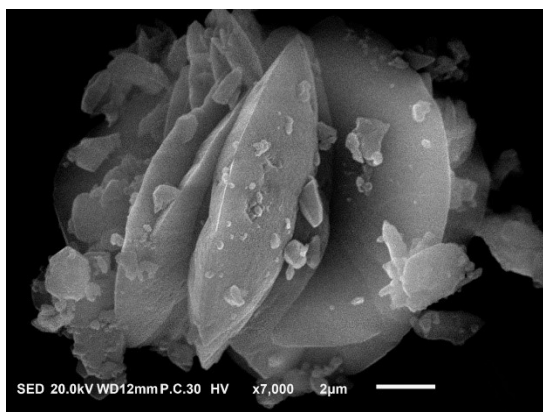

**1**

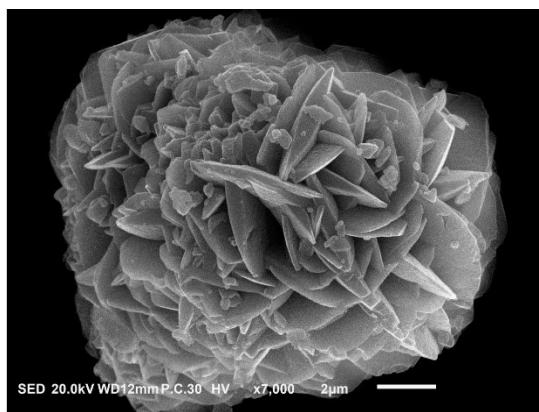

**2**

**Fig. S4.** SEM images of the powdered **1** and **2**.

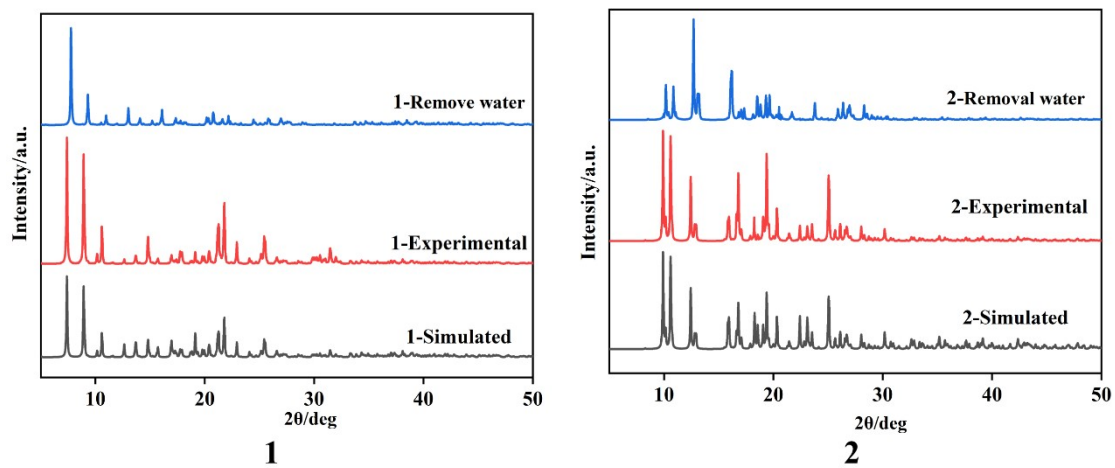

**Fig. S5.** The PXRD patterns for the simulated, synthesized samples, and removal of water molecules samples at 153°C for 1/2.

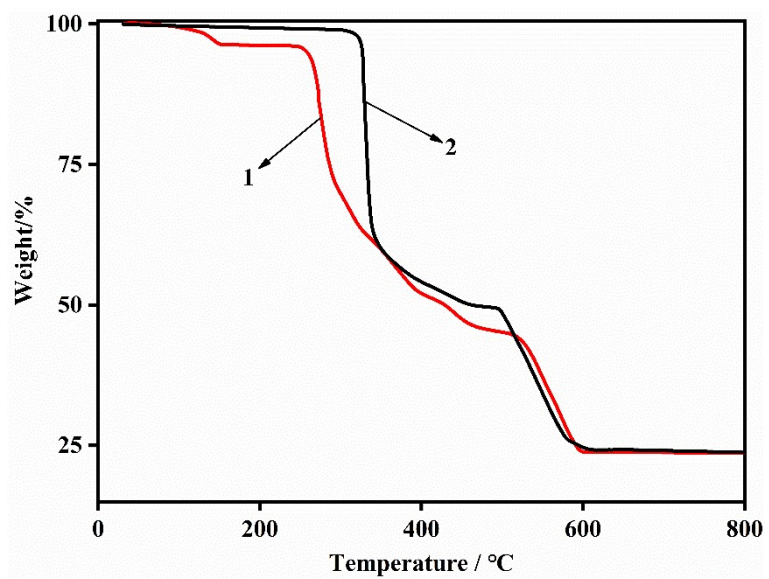

Fig. S6. TGA plots of complexes 1–2

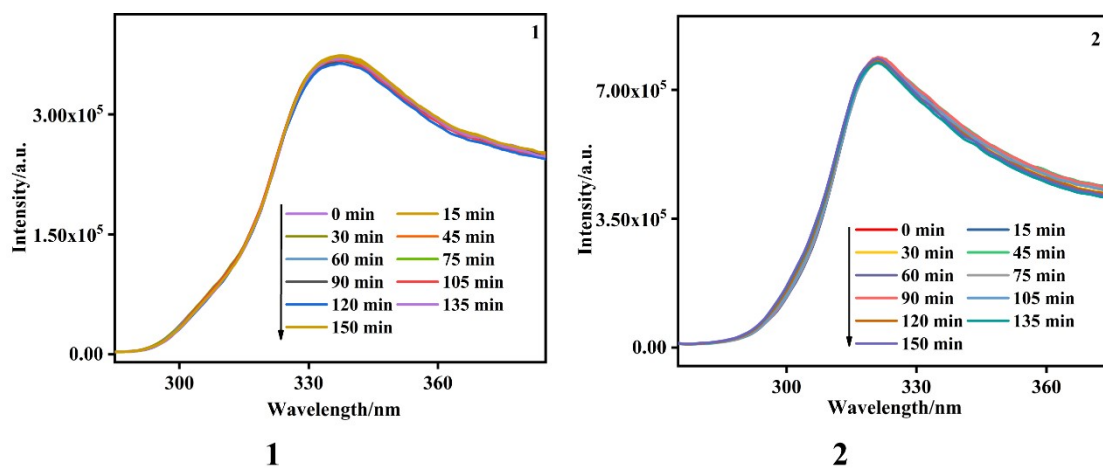

(a)

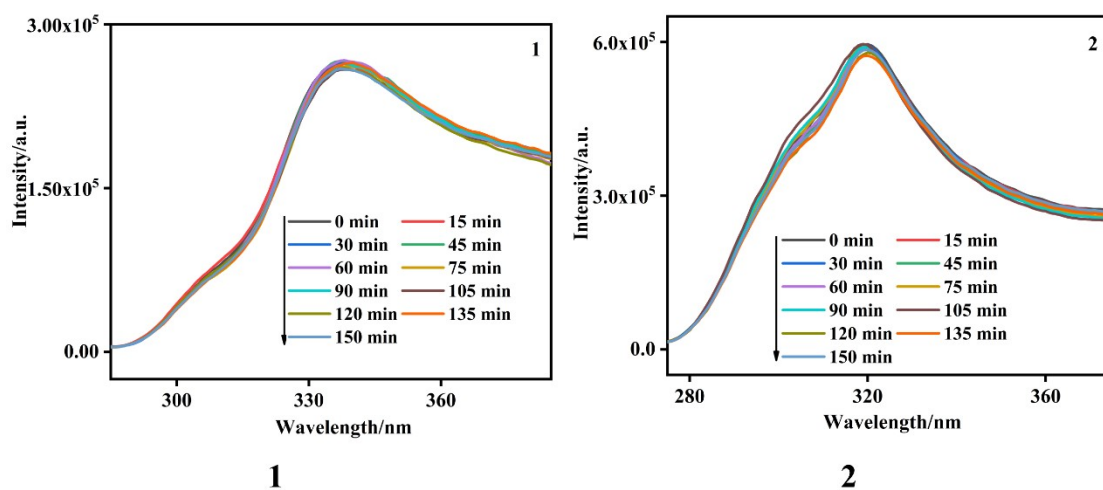

(b)

**Fig. S7.** Time-dependent luminescence emission spectra of **1** and **2** from 0 to 150 min by 15 min step (a) in water; (b) in EtOH.

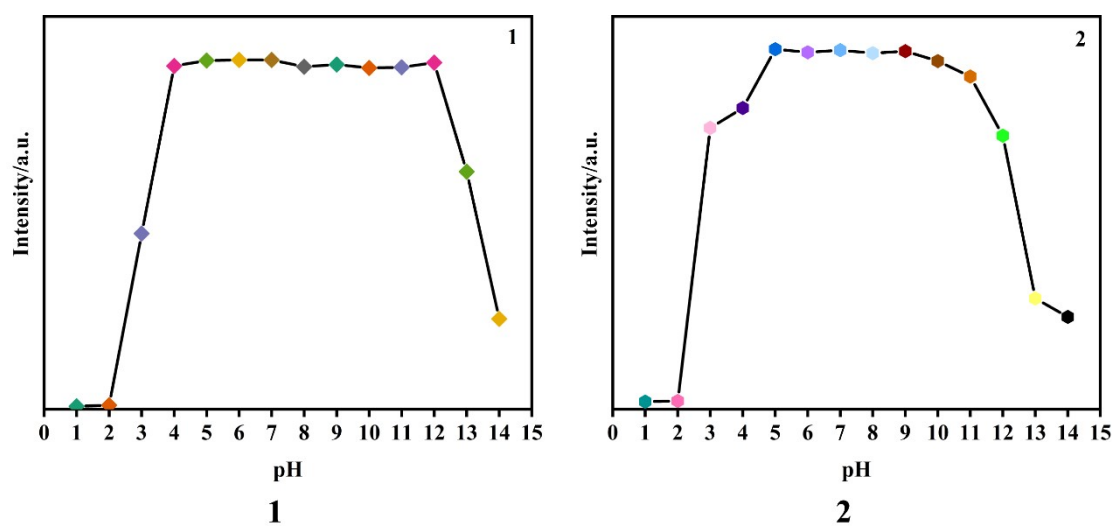

Fig. S8. The change of the fluorescence emission intensities of **1** and **2** in different pH solutions.

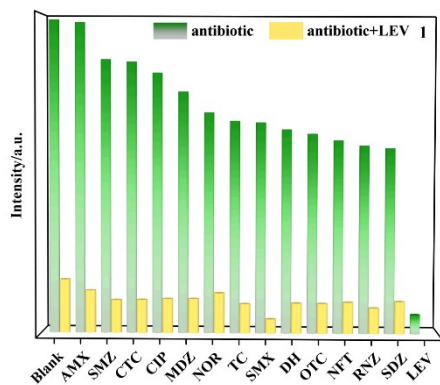

1

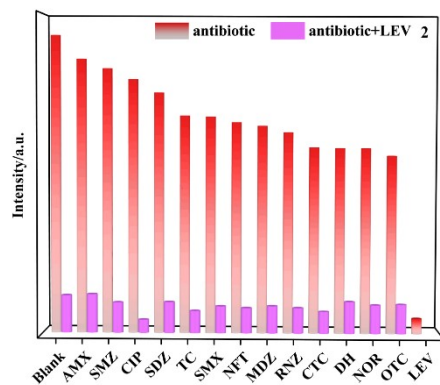

2

Fig. S9 Plots for the selective detection of LEV over other antibiotics mentioned.

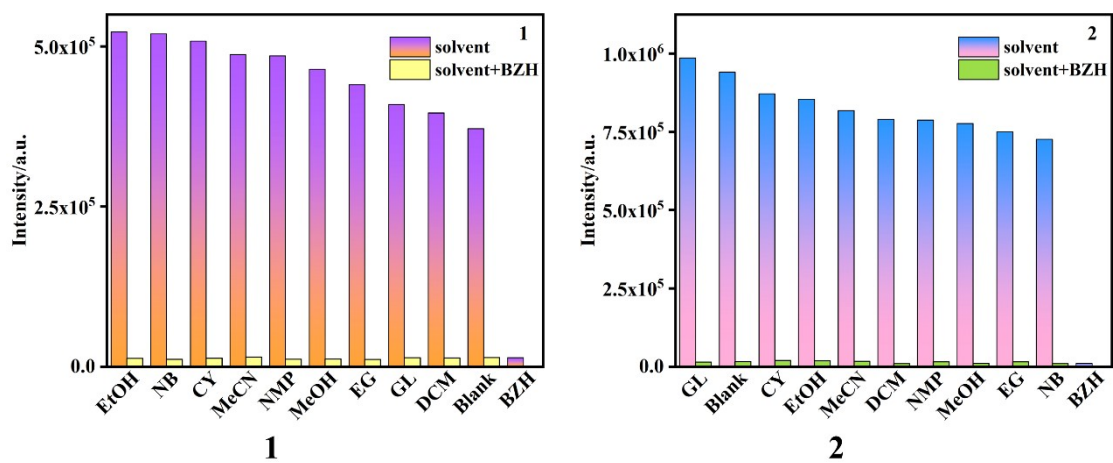

**Fig. S10** Relative intensities for **1** and **2** immersed in the individual solvents and mixtures of competing solvents including BZH.

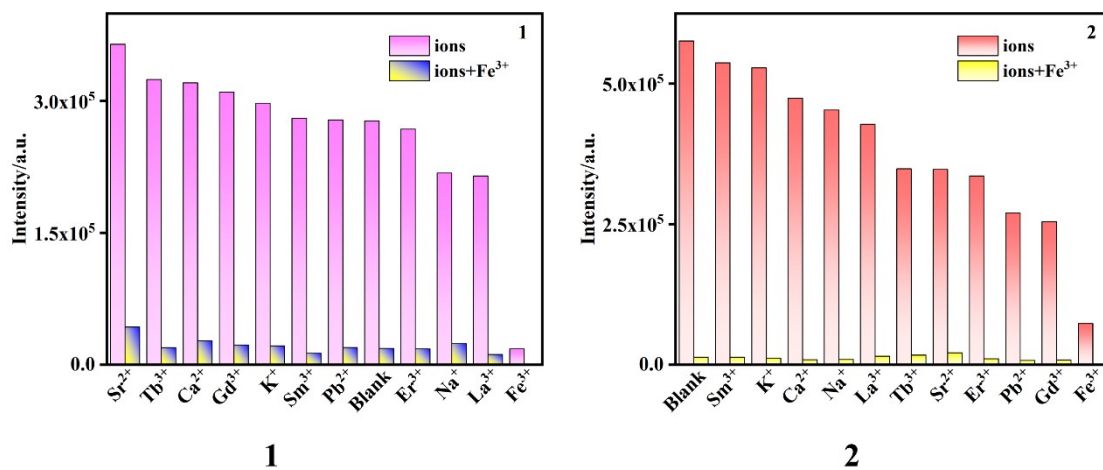

**Fig. S11.** Comparison of the fluorescence emission intensities of **1/2** for sensing Fe<sup>3+</sup> ions ( $5 \times 10^{-4}$  M) in the presence of other ions ( $5 \times 10^{-4}$  M).



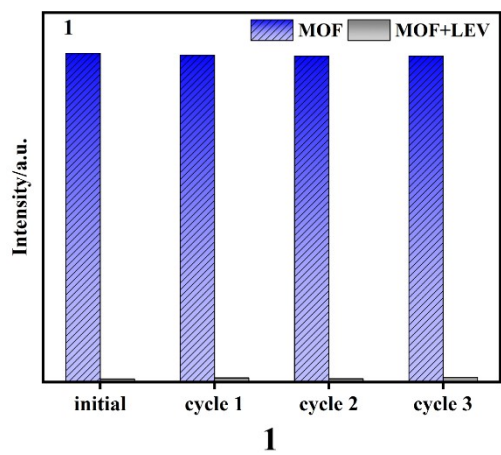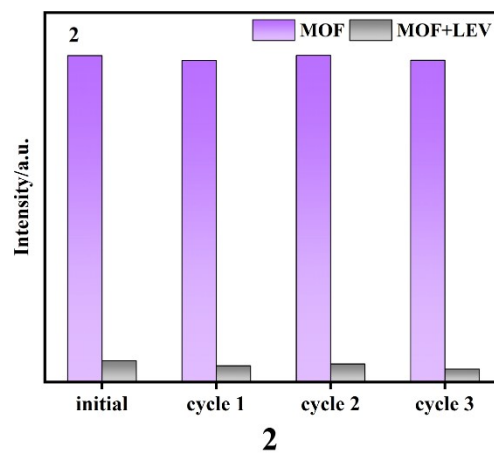

(a)

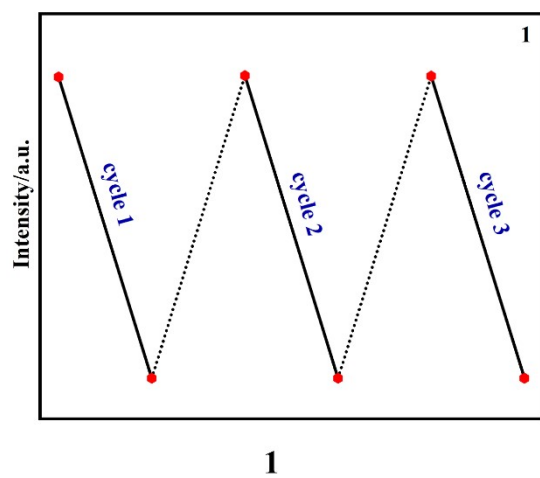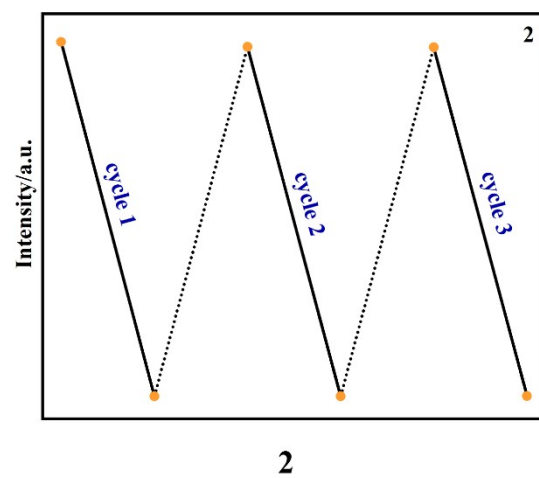

(b)

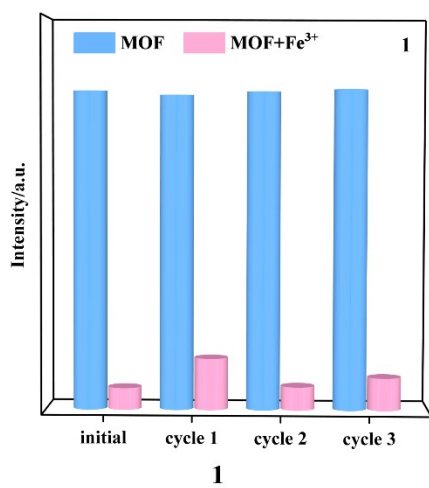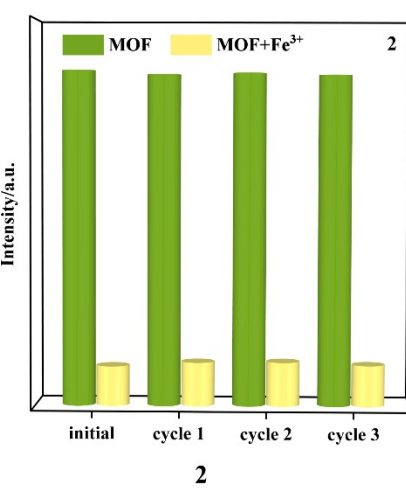

(c)

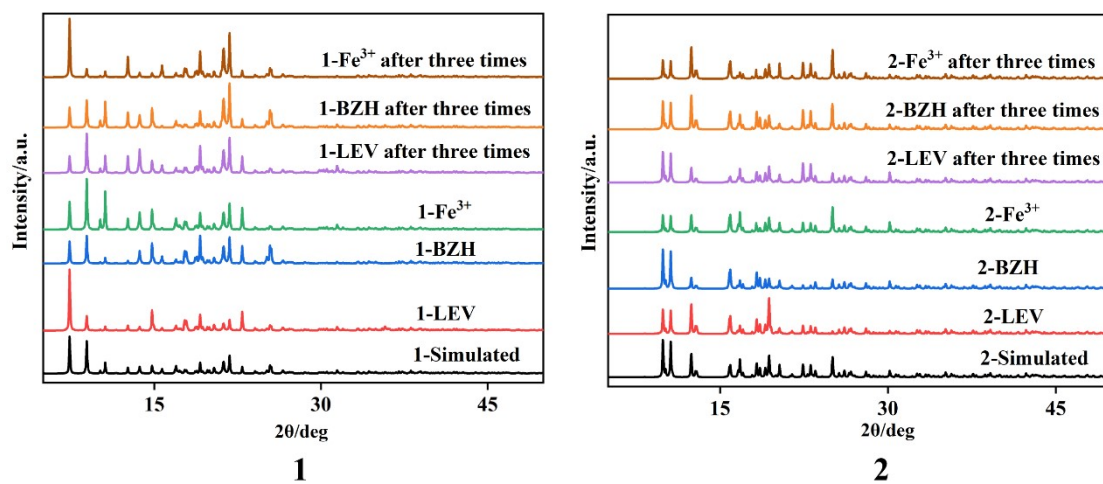

(d)

**Fig. S12.** The luminescence intensities of **1/2** for sensing LEV (a), BZH (b), and  $\text{Fe}^{3+}$  ions (c) over three cycles; (d) PXRD patterns of the simulated of **1/2** after sensing for three cycles.

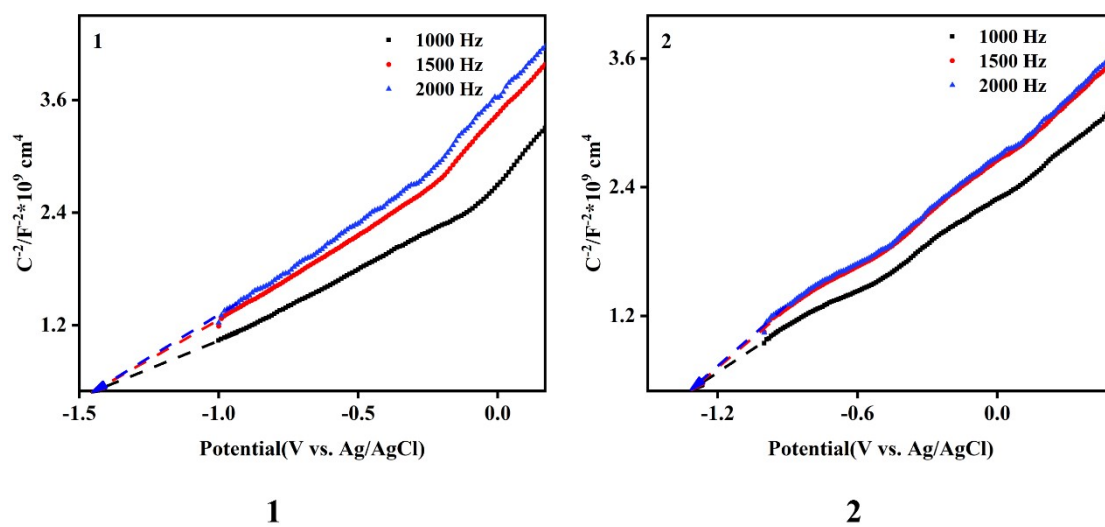

**Fig. S13.** Mott–Schottky plots for the two as-prepared materials in 0.1 M Na<sub>2</sub>SO<sub>4</sub> aqueous solution. AC amplitude is 10 mV, and the frequency is 1000, 1500 and 2000 Hz, respectively

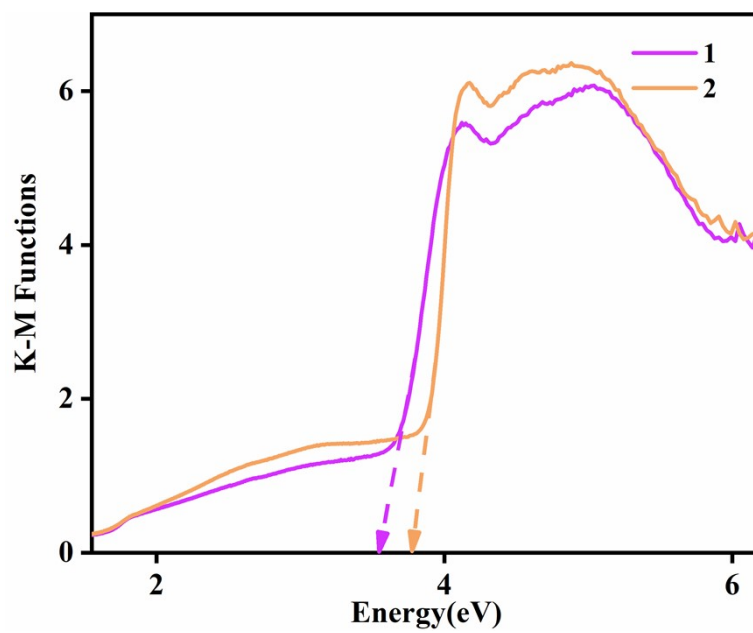

Fig. S14. Diffuse reflectance spectra of Kubelka–Munk function vs. energy of 1–2.

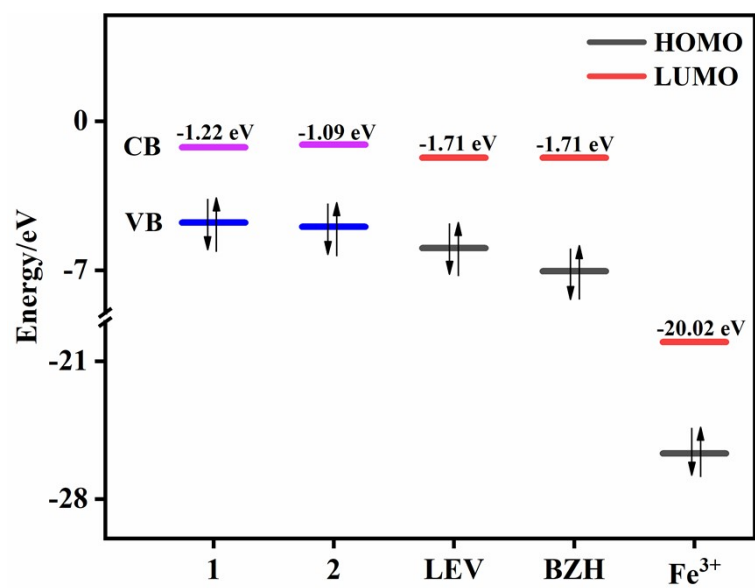

Fig. S15. Schematic band structures of 1, 2, LEV, BZH, and Fe<sup>3+</sup> ions.

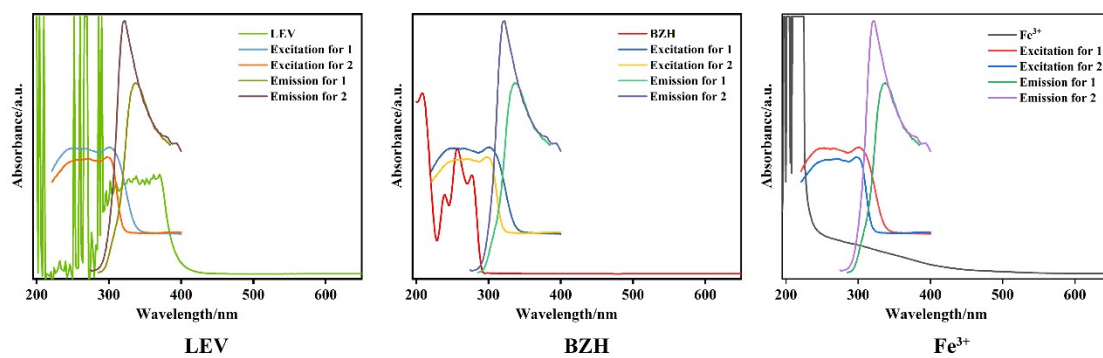

**Fig. S16.** Fluorescence excitation/emission spectra of **1/2** and UV-Vis absorption spectra of selected analytes.

### Section 3. Supplementary Characterizations

#### IR spectra

The broadband ( $3352\text{ cm}^{-1}$  in **1**) is observed in the IR spectrum, and it is attributed to O–H vibrations of coordinated water molecules. There is no characteristic C=O stretching mode of carboxylic acids near  $1700\text{ cm}^{-1}$ , indicating that the O-donor  $\text{H}_2\text{tdc}$  ligands are entirely deprotonated. The absorption peaks around  $1584, 1563, 1426, 1367\text{ cm}^{-1}$  for **1** and  $1547, 1528\text{ cm}^{-1}$  for **2** are attributed to the asymmetric ( $\nu_{\text{as}}(\text{COO})$ ) and symmetric ( $\nu_{\text{s}}(\text{COO})$ ) vibrations of the carboxylate groups, respectively. The separations  $\Delta\nu[\nu_{\text{as}}(\text{COO})-\nu_{\text{s}}(\text{COO})]$  reveal the presence of the coordination modes of monodentate ( $217\text{ cm}^{-1}$  for **1**), bridging ( $158\text{ cm}^{-1}$  for **1**) and chelating ( $21\text{ cm}^{-1}$  for **1**,  $19\text{ cm}^{-1}$  for **2**) types. The characteristic bands at ( $1526\text{ cm}^{-1}$  for **1**,  $1528\text{ cm}^{-1}$  for **2**) are assigned to the  $\nu_{\text{C=N}}$  stretching vibrations of the bis(pyridylbenzimidazole)-based ligands.

#### Optical band gaps

The diffuse reflectance data of the complexes **1–2** are transformed into Kubelka–Munk function to obtain their band gaps ( $E_{\text{g}}$ ). These values were determined as the intersection point between the energy axis and the line extrapolated from the linear portion of the adsorption edge in a plot of the Kubelka–Munk function  $F$  against energy  $E$ . The Kubelka–Munk function ( $F = (1 - R)^2/2R$ ) was transformed from the diffuse reflectance data, where  $R$  reflects an infinitely thick layer at a given wavelength.[9] The  $E_{\text{g}}$  values assessed from the steep absorption edge were  $3.55\text{ eV}$  for **1**,  $3.87\text{ eV}$  for **2** (Fig. S14).

#### References

[9] Z. W. He, C. J. Liu, W. D. Li, S. S. Han, S. S. Chen, *Crystals*, 2019, 9, 601.
